# Supplementary material
Source: PubMed Central journal article supplement (PMC3136281)
Supplement: 1104955108_sapp.pdf [file 1104955108_sapp.pdf]

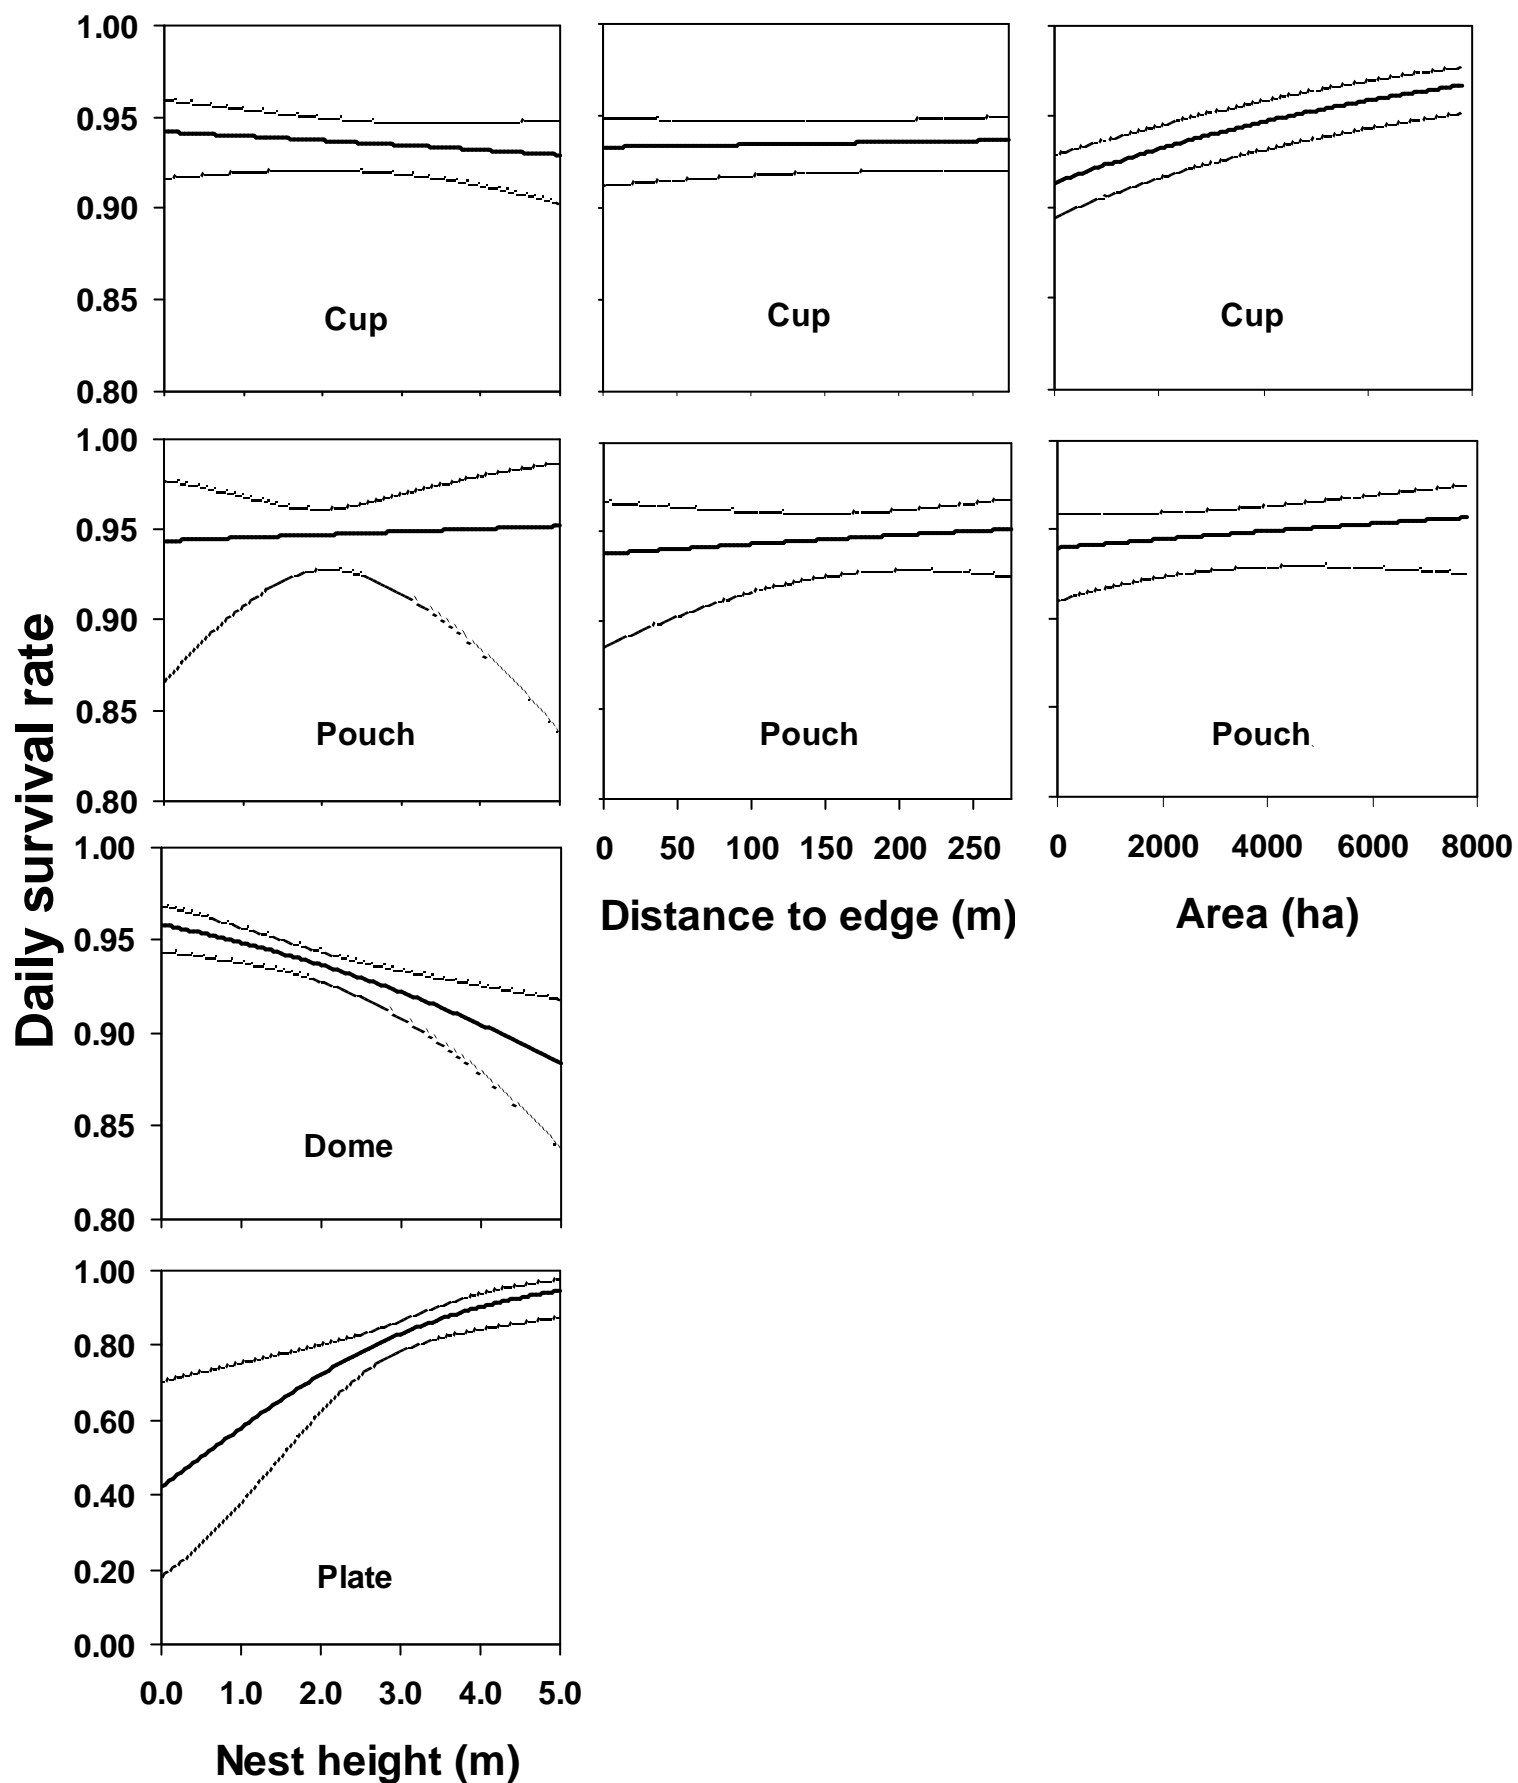

**Fig. S1.** Relation between daily survival rate (DSR) of nests and nest height, distance to edge, and area for four nest types. Solid lines represent the estimated DSR obtained by back transforming the appropriate logit-linear model with all covariates except the selected set to their mean value. Dashed lines represent upper and lower 95% confidence intervals.

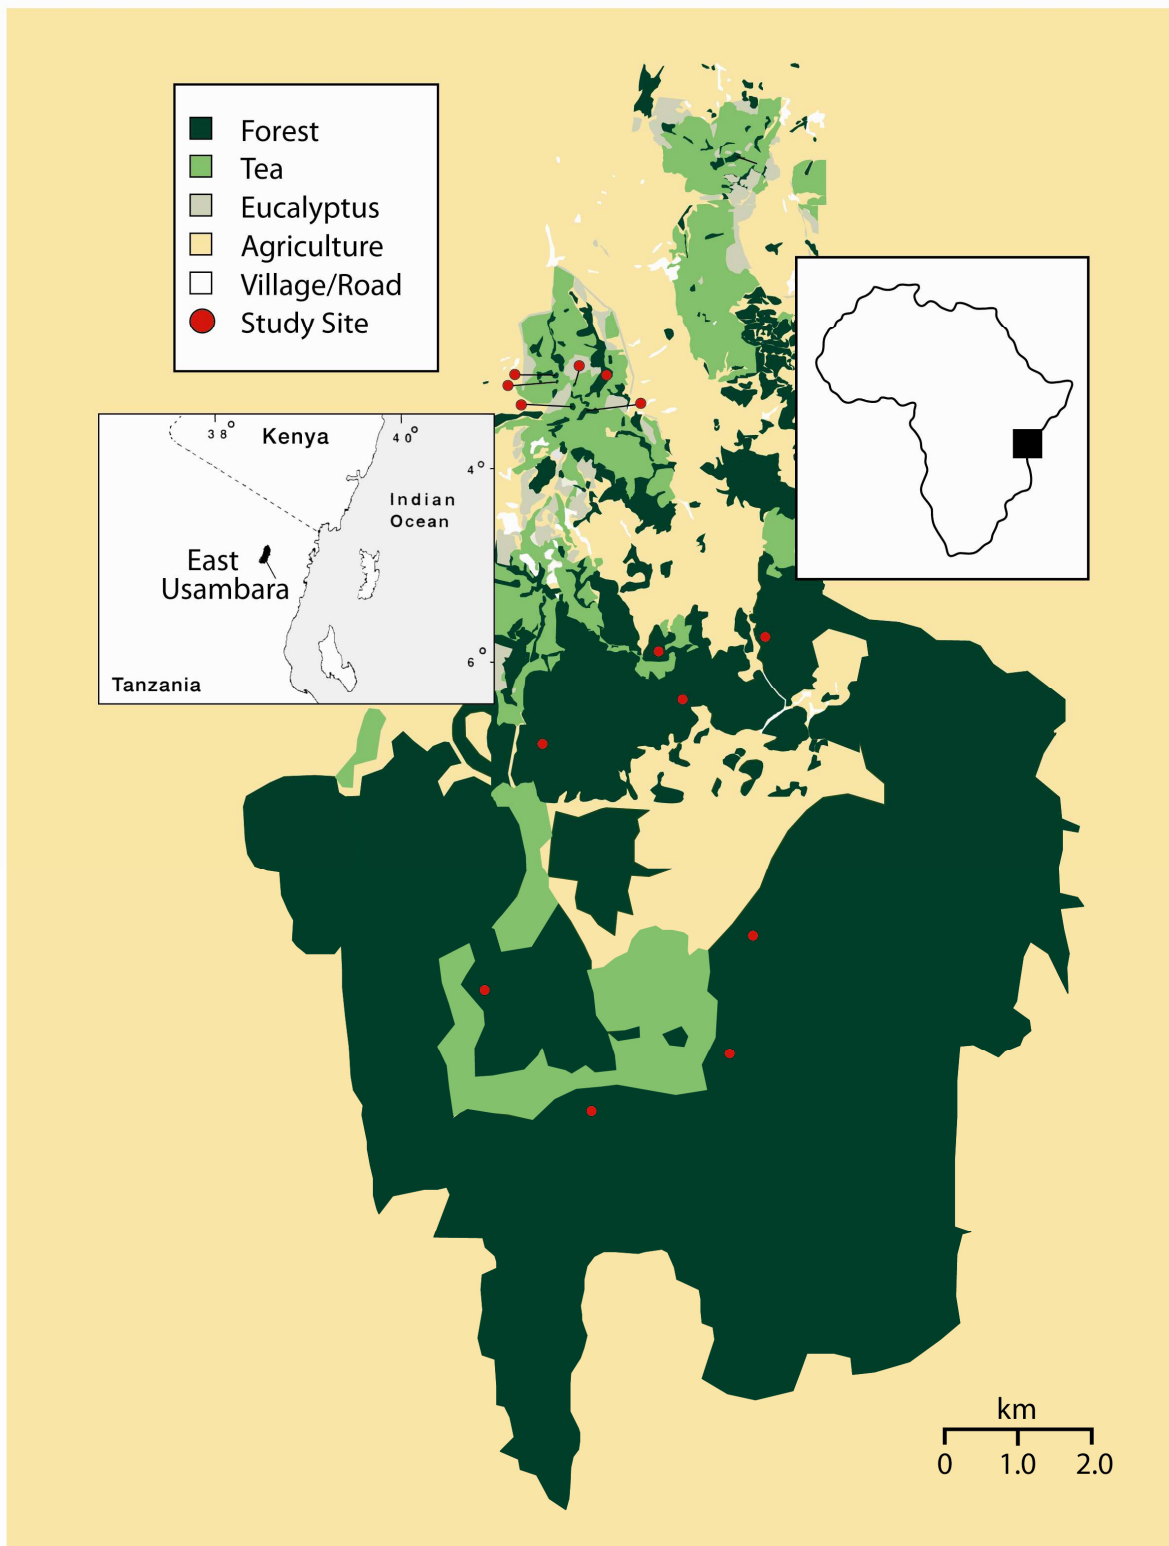

**Fig. S2.** Map of study area in the East Usambara Mountains, Tanzania.

**Table S1.** Number of nests ( $N$ ) in continuous and fragmented forest, nest type, and incubation and nestling length (mean  $\pm$  1 SE) for eight common understory bird species monitored during the 2004 breeding season.

| Species                                                         | Continuous<br>( $N$ ) | Fragmented<br>( $N$ ) | Nest type | Incubation<br>length (days) | Nestling length<br>(days) |
|-----------------------------------------------------------------|-----------------------|-----------------------|-----------|-----------------------------|---------------------------|
| African Broadbill <i>Smithornis capensis</i>                    | 24                    | 7                     | Pouch     | 19.1 $\pm$ 1.37 *           | 17.7 $\pm$ 1.62 *         |
| Orange Ground Thrush <i>Zoothera gurneyi</i>                    | 5                     | 1                     | Cup       | 15 †                        | 19 †                      |
| Cabanis's Greenbul <i>Phyllastrephus cabanisi</i>               | 27                    | 13                    | Cup       | 13.2 $\pm$ 1.11 *           | 15.5 $\pm$ 2.08 *         |
| Little Greenbul <i>Andropadus virens</i>                        | 30                    | 26                    | Cup       | 9.6 $\pm$ 1.63 *            | 21.2 $\pm$ 0.62 *         |
| White-tailed Crested Flycatcher <i>Trochocercus albonotatus</i> | 67                    | 2                     | Cup       | 21.8 $\pm$ 1.29 *           | 13.9 $\pm$ 0.31 *         |
| Forest Batis <i>Batis mixta</i>                                 | 15                    | 16                    | Cup       | 15.8 $\pm$ 1.22 *           | 18.0 $\pm$ 0.95 *         |
| Collared Sunbird <i>Anthreptes collaris</i>                     | 18                    | 2                     | Dome      | 15.9 $\pm$ 3.39 ‡           | 16.6 $\pm$ 1.77 ‡         |
| Olive Sunbird <i>Nectarinia olivacea</i>                        | 62                    | 13                    | Dome      | 14.6 $\pm$ 1.18 *           | 18.4 $\pm$ 1.50 *         |

\* Source: (21).

† Source: (53).

‡ Estimates derived from the 2003 – 2008 breeding season data using the methodology described in (21).

## Supporting References

53. Clement R (2000) *Thrushes*. (Princeton University Press, Princeton).

**Table S2.** Nest type and number of active nests (*N*) monitored across all study sites and breeding seasons in the East Usambara Mountains.

| Family/ Species                                                  | Nest type | <i>N</i> |
|------------------------------------------------------------------|-----------|----------|
| Columbidae (Pigeons & Doves)                                     |           |          |
| Tamborine Dove <i>Turtur tymanistria</i>                         | Plate     | 52       |
| Lemon Dove <i>Aplopelia larvata</i>                              | Plate     | 17       |
| Picidae (Woodpeckers)                                            |           |          |
| Cardinal Woodpecker <i>Dendropicos fuscescens</i>                | Cavity    | 3        |
| Eurylaimidae (Broadbills)                                        |           |          |
| African Broadbill <i>Smithornis capensis</i>                     | Pouch     | 57       |
| Pycnonotiidae (Bulbuls)                                          |           |          |
| Little Greenbul <i>Andropadus virens</i>                         | Cup       | 174      |
| Striped-cheeked Greenbul <i>Andropadus milanjensis</i>           | Cup       | 5        |
| Shelley's Greenbul <i>Andropadus masukuensis</i>                 | Cup       | 214      |
| Cabanis's Greenbul <i>Phyllastrephus cabanisi</i>                | Cup       | 54       |
| Tiny Greenbul <i>Phyllastrephus debilis</i>                      | Cup       | 19       |
| Yellow-streaked Greenbul <i>Phyllastrephus flavostriatus</i>     | Cup       | 5        |
| Turdidae (Thrushes)                                              |           |          |
| White-chested Alethe <i>Alethe fuelleborni</i>                   | Cup       | 7        |
| Sharpe's Akalat <i>Sheppardia sharpei</i>                        | Cup       | 10       |
| Usambara Thrush <i>Turdus roehli</i>                             | Cup       | 2        |
| Orange Ground Thrush <i>Zoothera gurneyi</i>                     | Cup       | 9        |
| Sylviidae (Warblers)                                             |           |          |
| Evergreen Forest Warbler <i>Bradypterus barratti</i>             | Cup       | 2        |
| Yellow-throated Woodland Warbler <i>Phylloscopus ruficapilla</i> | Dome      | 2        |
| Muscicapidae (Flycatchers)                                       |           |          |
| White-tailed Crested Flycatcher <i>Trochocercus albonotatus</i>  | Cup       | 120      |
| African Paradise Flycatcher <i>Terpsiphone viridis</i>           | Cup       | 142      |
| Forest Batis <i>Batis mixta</i>                                  | Cup       | 73       |
| Nectariniidae (Sunbirds)                                         |           |          |
| Collared Sunbird <i>Anthreptes collaris</i>                      | Dome      | 76       |
| Amani Sunbird <i>Anthreptes pallidigaster</i>                    | Dome      | 2        |
| Green-banded Sunbird <i>Anthreptes rubritorques</i>              | Dome      | 1        |
| Purple-banded Sunbird <i>Nectarinia bifasciata</i>               | Dome      | 1        |
| Olive Sunbird <i>Nectarinia olivacea</i>                         | Dome      | 265      |
| Zosteropidae (White-eyes)                                        |           |          |
| Yellow White-eye <i>Zosterops senegalensis</i>                   | Cup       | 1        |
| Estrildidae (Waxbills)                                           |           |          |
| Red-faced Crimsonwing <i>Cryptospiza reichenovii</i>             | Dome      | 1        |
| Green-backed Twinspot <i>Mandingoa nitidula</i>                  | Dome      | 1        |

**Table S3.** Top-ranked models assessing the influence of area, distance to edge, nest height, habitat disturbance, and breeding season on daily survival rate of nests for 13 understory bird species. Results are presented for competing models with  $\Delta AIC_c \leq 2$  and their associated parameter estimates and standard errors.  $K$  is total number of parameters and  $w_i$  is the Akaike weight.

| Species                 | Model                                       | $\Delta AIC_c$ | $w_i$ | $K$ | Parameter estimates (1 SE) |                                                      |                                                    |                    |                   |                   |                   |                  |                   |
|-------------------------|---------------------------------------------|----------------|-------|-----|----------------------------|------------------------------------------------------|----------------------------------------------------|--------------------|-------------------|-------------------|-------------------|------------------|-------------------|
|                         |                                             |                |       |     | intercept                  | 1                                                    | 2                                                  | 3                  | 4                 | 5                 | 6                 | 7                | 8                 |
| Tamborine Dove          | $S_{(HEIGHT)}$                              | 0.000          | 0.465 | 2   | -0.342<br>(0.748)          | 0.660*<br>(0.245)                                    |                                                    |                    |                   |                   |                   |                  |                   |
| Lemon Dove <sup>†</sup> | $S_{(DISTEDGE)}$                            | 0.000          | 0.471 | 2   | 1.802<br>(0.717)           | -0.006<br>(0.004)                                    |                                                    |                    |                   |                   |                   |                  |                   |
| African Broadbill       | $S_{(AREA)}$                                | 0.000          | 0.309 | 2   | 2.910<br>(0.173)           | 0.165<br>(0.180)                                     |                                                    |                    |                   |                   |                   |                  |                   |
|                         | $S_{(DISTEDGE)}$                            | 0.532          | 0.237 | 2   | 2.894<br>(0.170)           | 0.101<br>(0.172)                                     |                                                    |                    |                   |                   |                   |                  |                   |
|                         | $S_{(HEIGHT)}$                              | 0.848          | 0.203 | 2   | 2.891<br>(0.170)           | 0.026<br>(0.176)                                     |                                                    |                    |                   |                   |                   |                  |                   |
| Little Greenbul         | $S_{(AREA + HEIGHT + BRSEASON)}$            | 0.000          | 0.672 | 8   | 2.691<br>(0.498)           | $1.15 \times 10^{-4}$ *<br>( $4.57 \times 10^{-5}$ ) | -0.255<br>(0.167)                                  | -0.715*<br>(0.351) | 0.152<br>(0.402)  | 1.598*<br>(0.635) | 0.770*<br>(0.310) | 0.511<br>(0.417) |                   |
| Shelley's Greenbul      | $S_{(AREA)}$                                | 0.000          | 0.189 | 2   | 2.818<br>(0.107)           | -0.294<br>(0.262)                                    |                                                    |                    |                   |                   |                   |                  |                   |
|                         | $S_{(HEIGHT)}$                              | 0.178          | 0.173 | 2   | 2.432<br>(0.139)           | 0.140<br>(0.139)                                     |                                                    |                    |                   |                   |                   |                  |                   |
|                         | $S_{(AREA + DISTEDGE + BRSEASON)}$          | 0.764          | 0.129 | 8   | 2.213<br>(0.283)           | $2.92 \times 10^{-4}$<br>( $1.93 \times 10^{-4}$ )   | 0.001<br>(0.001)                                   | -2.167<br>(1.438)  | 0.126<br>(0.304)  | 0.744<br>(0.433)  | 0.507<br>(0.305)  | 0.692<br>(0.372) |                   |
|                         | $S_{(DISTEDGE)}$                            | 1.149          | 0.106 | 2   | 2.720<br>(0.141)           | $2.49 \times 10^{-4}$<br>( $9.01 \times 10^{-4}$ )   |                                                    |                    |                   |                   |                   |                  |                   |
|                         | $S_{(AREA + DISTEDGE + HEIGHT + BRSEASON)}$ | 1.219          | 0.102 | 9   | 1.737<br>(0.474)           | $2.99 \times 10^{-4}$<br>( $1.89 \times 10^{-4}$ )   | 0.002<br>(0.001)                                   | 0.180<br>(0.147)   | -2.216<br>(1.413) | 0.209<br>(0.311)  | 0.712<br>(0.434)  | 0.587<br>(0.313) | 0.733*<br>(0.374) |
|                         | $S_{(AREA + HEIGHT + BRSEASON)}$            | 1.393          | 0.094 | 8   | 2.039<br>(0.431)           | $3.43 \times 10^{-4}$<br>( $2.38 \times 10^{-4}$ )   | 0.150<br>(0.146)                                   | -2.492<br>(1.774)  | 0.141<br>(0.307)  | 0.619<br>(0.429)  | 0.469<br>(0.301)  | 0.571<br>(0.358) |                   |
|                         | $S_{(AREA + DISTEDGE)}$                     | 1.421          | 0.092 | 3   | 2.743<br>(0.143)           | $-3.81 \times 10^{-5}$<br>( $2.85 \times 10^{-5}$ )  | $7.53 \times 10^{-4}$<br>( $9.92 \times 10^{-4}$ ) |                    |                   |                   |                   |                  |                   |

|                                   |                                    |       |       |   |                  |                                                     |                    |                    |                   |                  |                   |                   |
|-----------------------------------|------------------------------------|-------|-------|---|------------------|-----------------------------------------------------|--------------------|--------------------|-------------------|------------------|-------------------|-------------------|
| Cabanis's Greenbul <sup>†</sup>   | $S_{(AREA + DISTEDGE)}$            | 0.000 | 0.480 | 3 | 2.475<br>(0.436) | $9.75 \times 10^{-5}*$<br>( $4.53 \times 10^{-5}$ ) | -0.003<br>(0.002)  |                    |                   |                  |                   |                   |
|                                   | $S_{(AREA)}$                       | 1.035 | 0.286 | 2 | 1.900<br>(0.239) | $8.28 \times 10^{-5}$<br>( $4.42 \times 10^{-5}$ )  |                    |                    |                   |                  |                   |                   |
| Tiny Greenbul <sup>‡</sup>        | $S_{(DISTEDGE + DISTURB)}$         | 0.000 | 0.275 | 4 | 1.777<br>(0.820) | 0.005<br>(0.003)                                    | -1.525*<br>(0.707) | -0.346<br>(0.790)  |                   |                  |                   |                   |
|                                   | $S_{(DISTURB)}$                    | 0.332 | 0.233 | 3 | 2.880<br>(0.514) | -1.407*<br>(0.676)                                  | -0.810<br>(0.747)  |                    |                   |                  |                   |                   |
|                                   | $S_{(AREA)}$                       | 0.910 | 0.174 | 2 | 1.809<br>(0.369) | $1.08 \times 10^{-4}$<br>( $7.96 \times 10^{-5}$ )  |                    |                    |                   |                  |                   |                   |
|                                   | $S_{(DISTEDGE)}$                   | 0.925 | 0.173 | 2 | 1.426<br>(0.580) | 0.004<br>(0.003)                                    |                    |                    |                   |                  |                   |                   |
| Orange Ground Thrush <sup>§</sup> | $S_{(DISTEDGE)}$                   | 0.000 | 0.485 | 2 | 3.536<br>(0.986) | -0.007<br>(0.006)                                   |                    |                    |                   |                  |                   |                   |
|                                   | $S_{(HEIGHT)}$                     | 1.153 | 0.273 | 2 | 2.014<br>(0.877) | 0.288<br>(0.482)                                    |                    |                    |                   |                  |                   |                   |
|                                   | $S_{(AREA)}$                       | 1.388 | 0.242 | 2 | 2.674<br>(0.644) | $-3.83 \times 10^{-5}$<br>( $1.09 \times 10^{-4}$ ) |                    |                    |                   |                  |                   |                   |
| White-tailed Crested Flycatcher   | $S_{(DISTEDGE)}$                   | 0.000 | 0.350 | 2 | 2.305<br>(0.279) | 0.001<br>(0.001)                                    |                    |                    |                   |                  |                   |                   |
|                                   | $S_{(HEIGHT)}$                     | 0.823 | 0.232 | 2 | 2.658<br>(0.303) | -0.067<br>(0.181)                                   |                    |                    |                   |                  |                   |                   |
|                                   | $S_{(AREA)}$                       | 0.960 | 0.217 | 2 | 2.553<br>(0.194) | $6.11 \times 10^{-7}$<br>( $3.42 \times 10^{-5}$ )  |                    |                    |                   |                  |                   |                   |
| African Paradise Flycatcher       | $S_{(AREA + HEIGHT + BRSEASON)}$   | 0.000 | 0.479 | 8 | 1.732<br>(0.543) | $3.31 \times 10^{-4}*$<br>( $1.47 \times 10^{-4}$ ) | 0.164<br>(0.162)   | -2.283*<br>(1.103) | -0.210<br>(0.390) | 0.173<br>(0.378) | 1.145*<br>(0.470) | -0.257<br>(0.564) |
|                                   | $S_{(AREA + DISTEDGE + BRSEASON)}$ | 0.094 | 0.457 | 8 | 2.479<br>(0.303) | $3.81 \times 10^{-4}$<br>( $2.00 \times 10^{-4}$ )  | -0.001<br>(0.001)  | -2.674<br>(1.476)  | -0.409<br>(0.403) | 0.038<br>(0.343) | 0.929<br>(0.461)  | -0.286<br>(0.564) |
| Forest Batis                      | $S_{(AREA + DISTEDGE + BRSEASON)}$ | 0.000 | 0.477 | 8 | 1.712<br>(0.446) | $7.78 \times 10^{-6}$<br>( $6.02 \times 10^{-5}$ )  | 0.004*<br>(0.002)  | -0.018<br>(0.493)  | 0.312<br>(0.646)  | 1.071<br>(0.698) | 2.385*<br>(0.813) | 0.171<br>(0.601)  |
|                                   | $S_{(BRSEASON)}$                   | 1.226 | 0.258 | 6 | 2.296<br>(0.373) | 0.073<br>(0.431)                                    | 0.253<br>(0.641)   | 1.076<br>(0.696)   | 2.114*<br>(0.803) | 0.245<br>(0.597) |                   |                   |

|                  |                                                          |       |       |   |                  |                                      |                    |                    |                  |                  |                  |                  |                   |  |
|------------------|----------------------------------------------------------|-------|-------|---|------------------|--------------------------------------|--------------------|--------------------|------------------|------------------|------------------|------------------|-------------------|--|
| Collared Sunbird | $S_{(\text{DISTEDGE} + \text{DISTURB})}$                 | 0.000 | 0.606 | 4 | 2.566<br>(0.348) | -0.050*<br>(0.022)                   | -0.096<br>(0.388)  | 0.972<br>(0.580)   |                  |                  |                  |                  |                   |  |
| Olive Sunbird    | $S_{(\text{DISTEDGE} + \text{DISTURB})}$                 | 0.000 | 0.290 | 4 | 3.052<br>(0.187) | -0.002<br>( $8.04 \times 10^{-4}$ )  | -0.102<br>(0.204)  | -0.485*<br>(0.215) |                  |                  |                  |                  |                   |  |
|                  | $S_{(\text{DISTURB})}$                                   | 1.580 | 0.132 | 3 | 2.877<br>(0.159) | -0.011<br>(0.198)                    | -0.469*<br>(0.214) |                    |                  |                  |                  |                  |                   |  |
|                  | $S_{(\text{HEIGHT} + \text{DISTURB} + \text{BRSEASON})}$ | 1.858 | 0.115 | 9 | 3.045<br>(0.320) | -0.178<br>(0.092)                    | -0.084<br>(0.208)  | -0.555*<br>(0.222) | 0.162<br>(0.223) | 0.375<br>(0.304) | 0.508<br>(0.295) | 0.130<br>(0.247) | 0.656*<br>(0.317) |  |
|                  | $S_{(\text{DISTEDGE})}$                                  | 1.878 | 0.114 | 2 | 2.889<br>(0.105) | -0.002*<br>( $7.69 \times 10^{-4}$ ) |                    |                    |                  |                  |                  |                  |                   |  |

\* Estimated 95% confidence interval for the parameter does not overlap zero.

† Restricted to candidate models with  $\leq 6$  estimated parameters because of sample size.

‡ Restricted to candidate models with  $\leq 4$  estimated parameters because of sample size.

§ Restricted to candidate models with  $\leq 2$  estimated parameters because of sample size.

**Table S4.** Top-ranked models assessing the influence of area, distance to edge, nest height, habitat disturbance, and breeding season on daily survival rate of nests for four nest types. Results are presented for competing models with  $\Delta AIC_c \leq 2$  and their associated parameter estimates and standard errors.  $K$  is total number of parameters and  $w_i$  is the Akaike weight.

| Nest type | Model                                            | $\Delta AIC_c$ | $w_i$ | $K$ | Parameter estimates (1 SE) |                    |                   |                    |                   |                   |                   |                   |  |
|-----------|--------------------------------------------------|----------------|-------|-----|----------------------------|--------------------|-------------------|--------------------|-------------------|-------------------|-------------------|-------------------|--|
|           |                                                  |                |       |     | intercept                  | 1                  | 2                 | 3                  | 4                 | 5                 | 6                 | 7                 |  |
| Plate     | $S_{(HEIGHT)}$                                   | 0.000          | 0.496 | 2   | -0.313<br>(0.606)          | 0.635*<br>(0.205)  |                   |                    |                   |                   |                   |                   |  |
| Cup       | $S_{(AREA + HEIGHT + BRSEASON)}$                 | 0.000          | 0.524 | 8   | 2.694<br>(0.120)           | 0.447*<br>(0.076)  | -0.033<br>(0.046) | -0.864*<br>(0.183) | 0.031<br>(0.169)  | 0.591*<br>(0.214) | 0.597*<br>(0.156) | 0.393*<br>(0.197) |  |
|           | $S_{(AREA + DISTEDGE + BRSEASON)}$               | 0.321          | 0.446 | 8   | 2.667<br>(0.117)           | 0.441*<br>(0.077)  | 0.022<br>(0.050)  | -0.837*<br>(0.180) | 0.072<br>(0.164)  | 0.616*<br>(0.213) | 0.633*<br>(0.156) | 0.431*<br>(0.199) |  |
| Dome      | $S_{(HEIGHT)}$                                   | 0.000          | 0.597 | 2   | 2.672<br>(0.068)           | -0.212*<br>(0.063) |                   |                    |                   |                   |                   |                   |  |
|           | $S_{(HEIGHT + DISTURB + HEIGHT \times DISTURB)}$ | 1.809          | 0.242 | 6   | 2.654<br>(0.069)           | -0.307*<br>(0.081) | -0.117<br>(0.088) | -0.152<br>(0.088)  | -0.133<br>(0.084) | -0.012<br>(0.071) |                   |                   |  |
| Pouch     | $S_{(AREA)}$                                     | 0.000          | 0.309 | 2   | 2.910<br>(0.173)           | 0.165<br>(0.180)   |                   |                    |                   |                   |                   |                   |  |
|           | $S_{(DISTEDGE)}$                                 | 0.532          | 0.237 | 2   | 2.894<br>(0.170)           | 0.101<br>(0.172)   |                   |                    |                   |                   |                   |                   |  |
|           | $S_{(HEIGHT)}$                                   | 0.848          | 0.203 | 2   | 2.891<br>(0.170)           | 0.026<br>(0.176)   |                   |                    |                   |                   |                   |                   |  |

\* Estimated 95% confidence interval for the parameter does not overlap zero.



**Table S5.** Candidate models for assessing influence of landscape structure and nest location on daily survival rate of nests for species and nest types.

| Model                                                                                    | No. model parameters |
|------------------------------------------------------------------------------------------|----------------------|
| $S_{(\text{AREA} + \text{DISTURB} + \text{DISTEDGE} + \text{HEIGHT} + \text{BRSEASON})}$ | 11                   |
| $S_{(\text{AREA} + \text{DISTEDGE} + \text{HEIGHT} + \text{BRSEASON})}$                  | 9                    |
| $S_{(\text{DISTURB} + \text{HEIGHT} + \text{BRSEASON})}$                                 | 9                    |
| $S_{(\text{AREA} + \text{HEIGHT} + \text{BRSEASON})}$                                    | 8                    |
| $S_{(\text{AREA} + \text{DISTEDGE} + \text{BRSEASON})}$                                  | 8                    |
| $S_{(\text{HEIGHT} + \text{DISTURB} + \text{HEIGHT} \times \text{DISTURB})}$             | 6                    |
| $S_{(\text{BRSEASON})}$                                                                  | 6                    |
| $S_{(\text{AREA} + \text{DISTURB} + \text{AREA} \times \text{DISTURB})}$                 | 6                    |
| $S_{(\text{DISTURB} + \text{DISTEDGE})}$                                                 | 4                    |
| $S_{(\text{AREA} + \text{DISTEDGE})}$                                                    | 3                    |
| $S_{(\text{DISTURB})}$                                                                   | 3                    |
| $S_{(\text{AREA})}$                                                                      | 2                    |
| $S_{(\text{HEIGHT})}$                                                                    | 2                    |
| $S_{(\text{DISTEDGE})}$                                                                  | 2                    |
